# Supplementary material
Source: PubMed Central journal article supplement (PMC2573927)

**A**

| Culture conditions            | control | GSKi | MEKi<br>(2 $\mu$ M) | MEKi<br>(3 $\mu$ M) | MEKi (3 $\mu$ M)<br>GSKi |
|-------------------------------|---------|------|---------------------|---------------------|--------------------------|
| No of GFP expressing colonies | 0       | 0    | 51                  | 55                  | 40                       |

**B**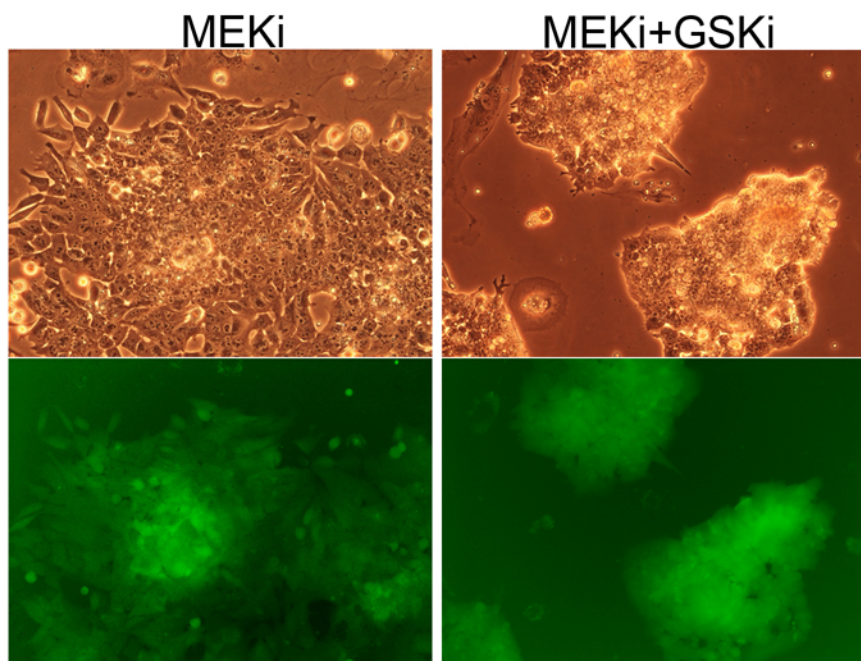**C**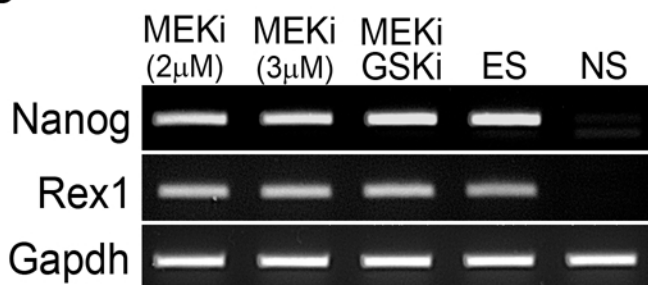

Supplement: pbio.0060253.sg004.pdf [file pbio.0060253.sg004.pdf]
