# Supplementary material
Source: PubMed Central journal article supplement (PMC2573927)

A

Dapi RC2

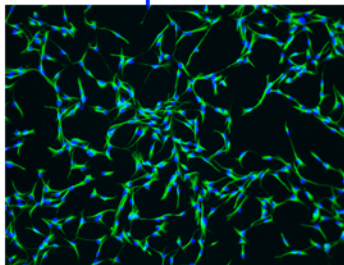

B

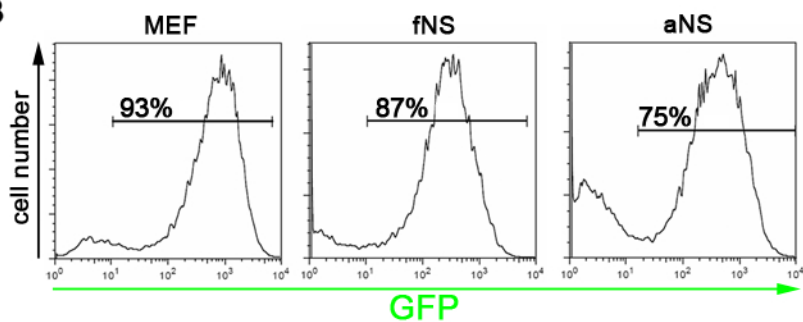

C

Oct4 Dapi Nanog

Nanog

Oct4

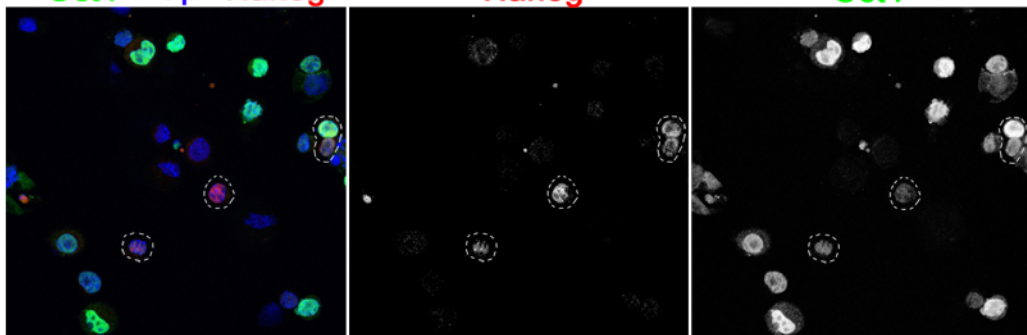

D

DAPI Oct4 me3K27

DAPI

Oct4

me3K27

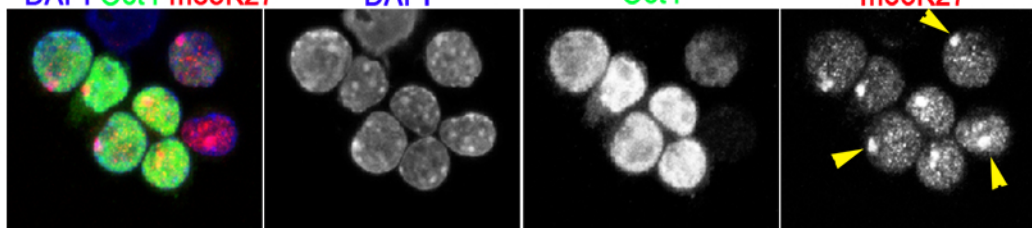

Supplement: pbio.0060253.sg001.pdf [file pbio.0060253.sg001.pdf]

Infection

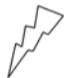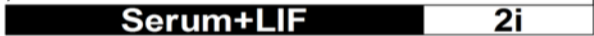

**Serum+LIF**

24 days

**2i**

10 days

AP  
staining

# Mef O4G

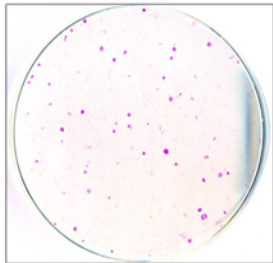

45 2i-iPS colonies/  
 $8 \times 10^5$  plated cells

Supplement: pbio.0060253.sg002.pdf [file pbio.0060253.sg002.pdf]

**A**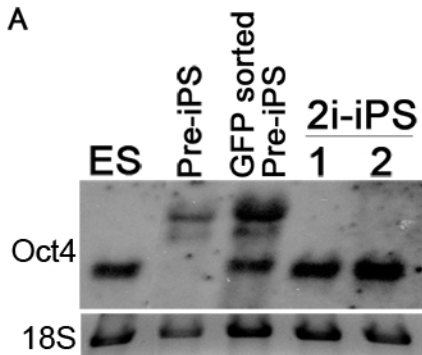**B**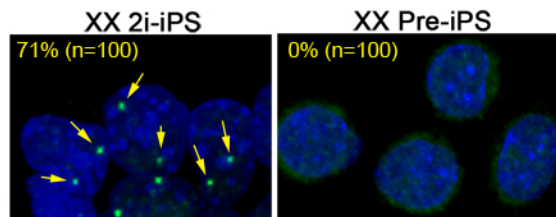**C**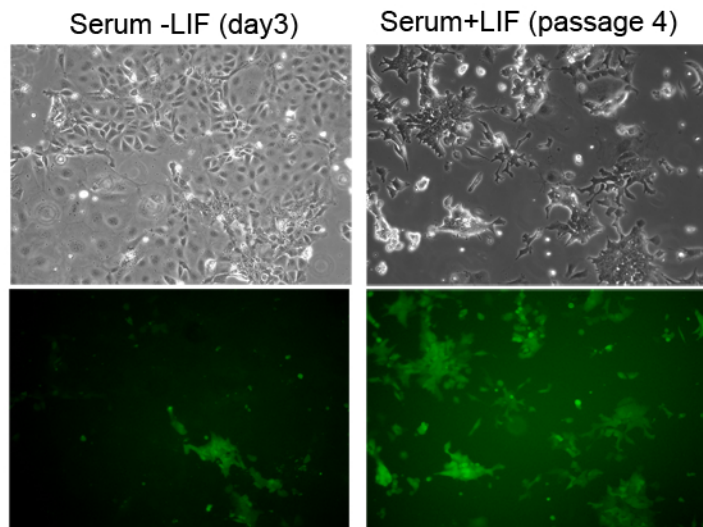**D**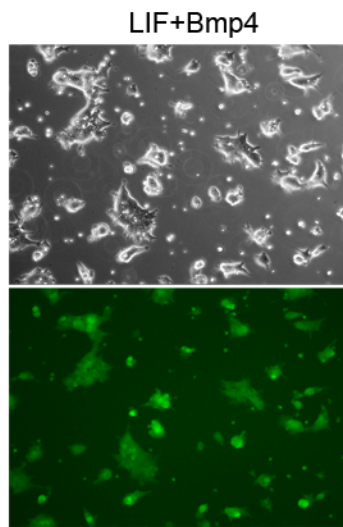

Supplement: pbio.0060253.sg003.pdf [file pbio.0060253.sg003.pdf]

A

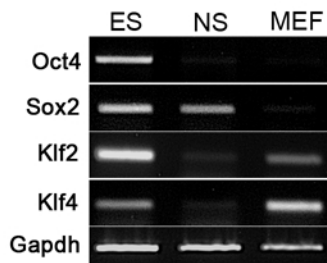

B

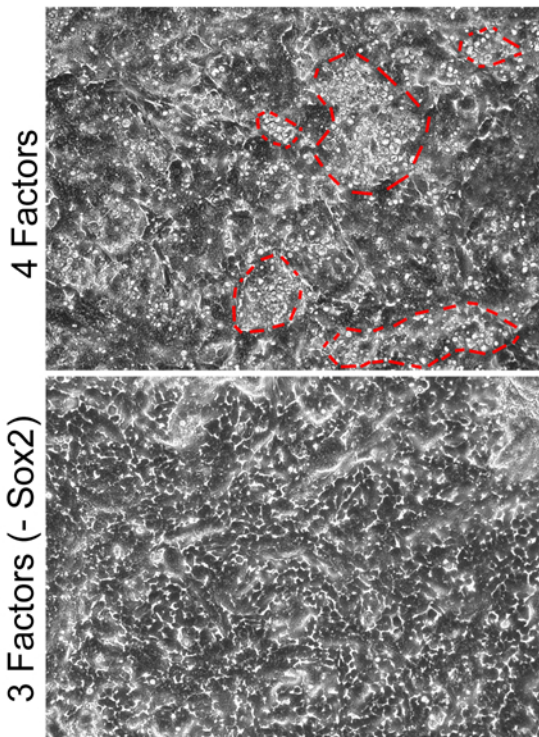

C

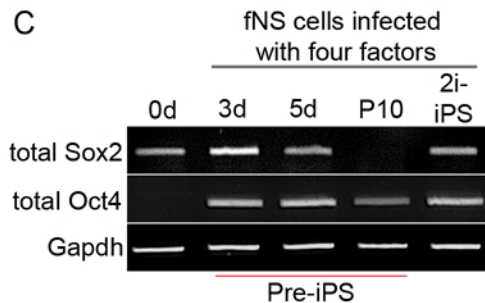

Supplement: pbio.0060253.sg005.pdf [file pbio.0060253.sg005.pdf]

A

Nanog RFP DAPI

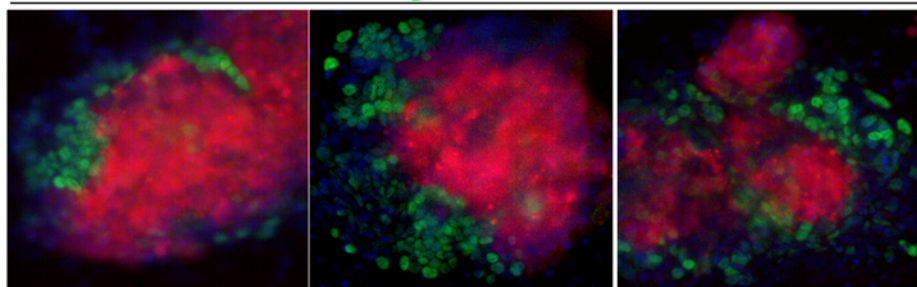

B

Infection

AP  
staining

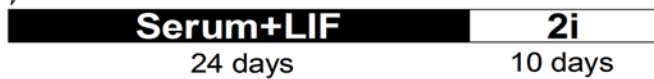

Mef 129

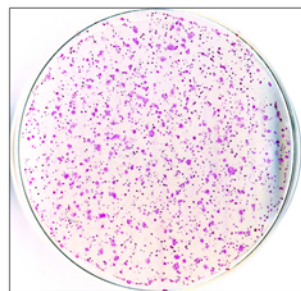

0.17% efficiency

Supplement: pbio.0060253.sg006.pdf [file pbio.0060253.sg006.pdf]
